# Supplementary material
Source: ML conference proceedings conference paper supplement (https://aclanthology.org/2022.findings-emnlp.450)
Supplement: note [file 2022.findings-emnlp.450.note.pdf]

We have addressed the Meta-Reviewers' request to provide the k value for the CLIP ablation study. This information is available in Appendix A.
